# Supplementary material for: Hospital-diagnosed infections before age 20 and risk of a subsequent multiple sclerosis diagnosis
Source: Oxford University Press journal article supplement (doi:10.1093/brain/awab100), 2021-03-07
Supplement: awab100_supplementary_data.pdf [file awab100_supplementary_data.pdf]

Supplemental Table 1. ICD codes for infections

| Infection                | ICD version | ICD                                                                                                                                                                                                                             |
|--------------------------|-------------|---------------------------------------------------------------------------------------------------------------------------------------------------------------------------------------------------------------------------------|
| Infectious mononucleosis | ICD-8       | 075                                                                                                                                                                                                                             |
|                          | ICD-9       | 075                                                                                                                                                                                                                             |
|                          | ICD-10      | B27                                                                                                                                                                                                                             |
| Pneumonia                | ICD-8       | 480-486                                                                                                                                                                                                                         |
|                          | ICD-9       | 480-486                                                                                                                                                                                                                         |
|                          | ICD-10      | J12-J18, P23                                                                                                                                                                                                                    |
| CNS                      | ICD-8       | 013,062,063,064,065,066,071,094,292,320,323,324,390,474,040-046                                                                                                                                                                 |
|                          | ICD-9       | 013,062,063,064,071,094,320,323,326,392,045-049                                                                                                                                                                                 |
|                          | ICD-10      | A17,A80-A89,G00,G01,G02,G04,G05,I02                                                                                                                                                                                             |
| Gastrointestinal         | ICD-8       | 014,123,127,129,540,567,000-009                                                                                                                                                                                                 |
|                          | ICD-9       | 014,123,127,129,540,567,000-009                                                                                                                                                                                                 |
|                          | ICD-10      | A00-A09,B71,B81,B82,K35,K65,K67                                                                                                                                                                                                 |
| Genitourinary            | ICD-8       | 016,590,595,597                                                                                                                                                                                                                 |
|                          | ICD-9       | 016,590,595,597                                                                                                                                                                                                                 |
|                          | ICD-10      | N30,N34,O23                                                                                                                                                                                                                     |
| Respiratory              | ICD-8       | 010,011,012,033,034,075,115,116,490,501,503,510,460-466,470-474,480-486                                                                                                                                                         |
|                          | ICD-9       | 010,011,012,033,034,075,115,116,473,475,487,490,510,460-466,480-486                                                                                                                                                             |
|                          | ICD-10      | A15,A16,A37,A38,B27,B39,B40,B41,B42,B44,B59,J00-J06,J10,J12-J18,J20-J22,J32,J36,J40-J42,J86,P23                                                                                                                                 |
| Skin                     | ICD-8       | 110,111,050-057,680-686                                                                                                                                                                                                         |
|                          | ICD-9       | 110,111,050-057,680-686                                                                                                                                                                                                         |
|                          | ICD-10      | B00-B09,B35,B36,B43,L00-L08                                                                                                                                                                                                     |
| Bacterial                | ICD-8       | 000,001,002,003,004,005,073,076,080,081,082,083,320,362,380,381,382,383,421,461,481,482,501,510,567,590,595,597,612,613,614,616,620,622,630,635,670,678,680,681,682,684,710,720,010-019,020-027,030-039,090-099,100-104,390-392 |
|                          | ICD-9       | 001,002,003,004,005,073,076,077,078,079,080,081,082,083,320,381,382,383,383,421,461,475,481,482,510,567,590,595,597,670,730,010-018,020-027,030-041,090-099,100-104,390-392,614-616,680-686                                     |
|                          | ICD-10      | A00,A01,A02,A03,A04,A05,A15-A19,A20-A28,A30-A49,A50-A58,A65-A69,A70-A74,A75-A79,B95,B96,G00,G01,H60,H70,I00-I02,I33,J01,J13,J14,J15,J36,J86,K65,L00-L08,M00,M86,N30,N34,N70-N77,O23,O85,O86,P36                                 |
| Viral                    | ICD-8       | 075,360,420,422,460,464,465,466,480,040-046,050-057,060-068,070-079,470-474                                                                                                                                                     |

---

|       |        |                                                                                                                                                     |
|-------|--------|-----------------------------------------------------------------------------------------------------------------------------------------------------|
|       | ICD-9  | 070,071,072,074,075,077,078,079,372,420,422,460,464,<br>465,466,480,487,647,711,045-049,050-057,060-066                                             |
|       | ICD-10 | A08,A60,A80-A89,A90-A99,B00-B09,B15-B19,<br>B20-B24,B25-B34,B27,B97,B99,H10,I30,I40,J00,J04,<br>J05,J06,J10,J12,J20,J21,O98,P35,Z21                 |
| Other | ICD-8  | 084,085,086,087,088,089,112,113,114,117,120,121,122,<br>124,<br>125,126,128,130, 131,132,133,134,135,136,363,610,611,<br>615,732,763,Y41            |
|       | ICD-9  | 084,085,086,087,088,112,113,114,117,118,120,121,122,<br>124,125,126,128,130,131,132,133,134,135,136,370,675,<br>771,137-139                         |
|       | ICD-10 | V02,B37,B38,B45,B46,B47,B48,B49,B50-B58,B60-B64,<br>B65-B70,B72-B80,B83,B85-B89,B90-B94,H16,H32,<br>M01,M02,M03,O91,P37,P38,P39,Z22, A59,A63 ,A64 , |

---

Abbreviations: ICD = International Classification of Diseases

Supplemental Table 2. Tetrachoric correlations among infections by type and site at ages 11-19 years

|                  | CNS  | Genitourinary | Respiratory | Skin | Gastrointestinal | Bacterial | Viral | Other |
|------------------|------|---------------|-------------|------|------------------|-----------|-------|-------|
| CNS              | -    |               |             |      |                  |           |       |       |
| Genitourinary    | 0.10 | -             |             |      |                  |           |       |       |
| Respiratory      | 0.21 | 0.25          | -           |      |                  |           |       |       |
| Skin             | 0.18 | 0.21          | 0.27        | -    |                  |           |       |       |
| Gastrointestinal | 0.10 | 0.12          | 0.14        | 0.10 | -                |           |       |       |
| Bacterial        | 0.38 | 1.00          | 0.65        | 0.78 | 0.23             | -         |       |       |
| Viral            | 0.68 | 0.27          | 0.80        | 0.59 | 0.19             | 0.45      | -     |       |
| Other            | 0.10 | 0.31          | 0.22        | 0.26 | 0.08             | 0.49      | 0.32  | -     |

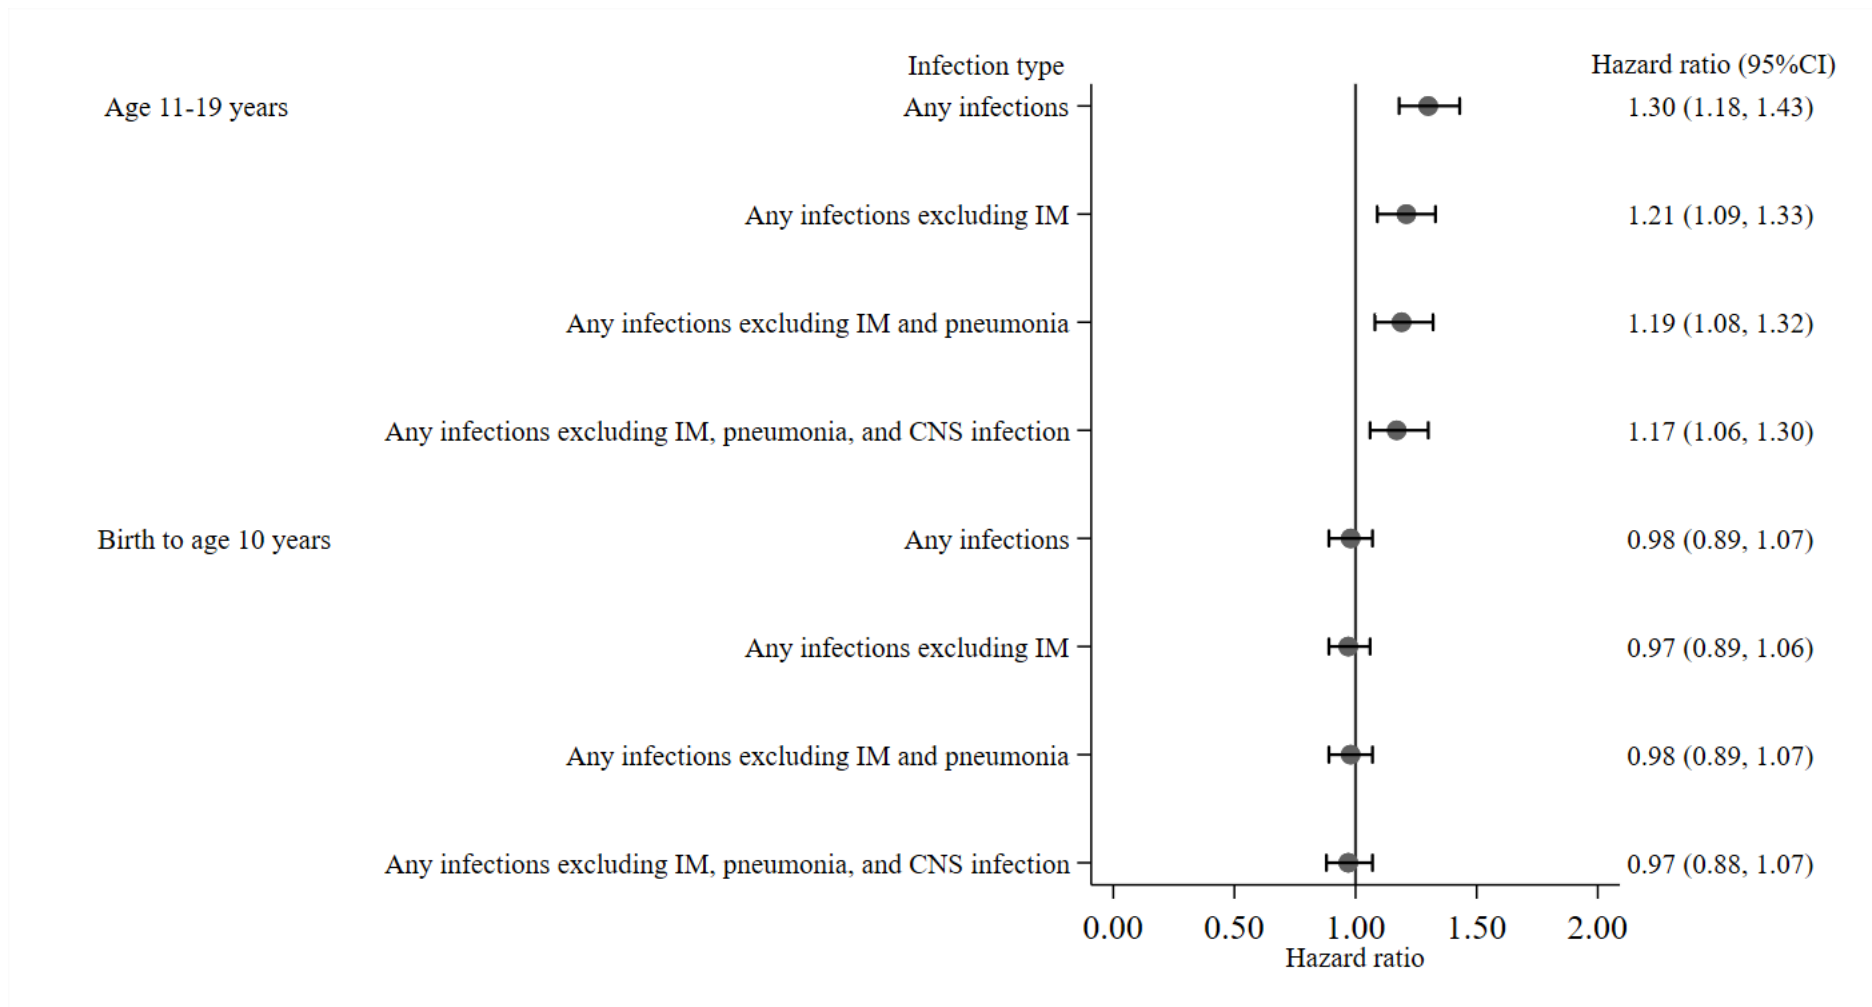

Supplemental figure 1. Hazard ratio and 95% confidence interval for risk of a multiple sclerosis diagnosis associated with all infections stratified by age period and models.

Abbreviations: IM = infectious mononucleosis; CI = confidence interval.

Hazard ratios are from the three-step multivariable regression with encephalomyelitis and infectious mononucleosis (step 1), pneumonia (step 2), and CNS infection (step 3) was excluded from the definition of infection. All models included measures of any infections in earlier childhood (from birth to age 10 years) and adolescence (age 11 to 19 years), with adjustment for sex and parental socioeconomic position. No infection in earlier childhood and adolescence were the reference groups.
